# Supplementary material for: RE-IIBP Methylates H3K79 and Induces MEIS1-mediated Apoptosis via H2BK120 Ubiquitination by RNF20
Source: PubMed Central journal article supplement (PMC4513340; doi:10.1038/srep12485), 2015-07-24
Supplement: srep12485-s1.pdf [file srep12485-s1.pdf]

**Supplemental Information**

**RE-IIBP Methylates H3K79 and Induces MEIS1-mediated Apoptosis via H2BK120 Ubiquitination by RNF20**

Jin Woo Park, Kee-Beom Kim, Ji-Young Kim, Yun-Cheol Chae, Oh-Seok Jeong, and Sang-Beom Seo

<sup>1</sup>Department of Life Science, College of Natural Sciences, Chung-Ang University, Seoul 156-756, Republic of Korea

<sup>2</sup>Present address: Division of Reproductive Science in Medicine, Department of OB/GYN, Feinberg School of Medicine, Northwestern University, Chicago, IL 60611, USA

\*Correspondence: [sangbs@cau.ac.kr](mailto:sangbs@cau.ac.kr)

| Name                            | Sequence (5' to -3')                                     | Purpose      |
|---------------------------------|----------------------------------------------------------|--------------|
| pMEIS1(-1345/+238)-F            | GGTACCCGCTGGAGAAAGAGCTAGT                                | promoter-luc |
| pMEIS1(-1345/+238)-R            | AAGCTTGCTCCGTTTCCAAGACA                                  |              |
| shMMSET sense                   | CCGGGGCATTGTTCAAGCAGAAGACTCGAGTCTTCTGCTTGAACAATGCCCTTTTG | shRNA        |
| shMMSET anti-sense              | AATTCAAAAGGGCATTGTTCAAGCAGAAGACTCGAGTCTTCTGCTTGAACAATGCC |              |
| shDOTL1 sense                   | CCGGCGCCAACACGAGTGTTATATTCTCGAGAATAAACACTCGTGTGGCGTTTTG  | shRNA        |
| shDOTL1 anti-sense              | AATTCAAAACGCCAACACGAGTGTTATATTCTCGAGAATAAACACTCGTGTGGCG  |              |
| shREIIBP #1 sense               | CCGGCGGAAAGCCAAGTTCACCTTTCTCGAGAAAGGTGAACCTGGCTTCCGTTTTG | shRNA        |
| shREIIBP #1 anti-sense          | AATTCAAAACGCCAAAGTTCACCTTTCTCGAAAGGTGAACCTGGCTTCCG       |              |
| shREIIBP #2 sense               | CCGGCCAGAAAGAGCTTGGATATTCTCGAGAATATCCAAGCTCTTCTGGGTTTTG  | shRNA        |
| shREIIBP #2 anti-sense          | AATTCAAAACCCAGAAAGAGCTTGGATATTCTCGAGAATATCCAAGCTCTTCTGGG |              |
| MEIS1 promoter F                | TTCAAGAGAGTCGGCTTTGG                                     | ChIP         |
| MEIS1 promoter R                | GTGCGCTTACACAATGC                                        |              |
| MEIS1 <a href="#">disital</a> F | TGAATGGTCCCCTAAGCACA                                     | ChIP         |
| MEIS1 <a href="#">disital</a> R | AGGGAGCAGCAAGTGGTCTT                                     |              |
| MEIS1- F                        | CAAGGTGATGGCTTGGACAA                                     | RT-PCR       |
| MEIS1-R                         | CTCCGGGCATTAATAAACCAA                                    |              |
| DOT1L-F                         | CGCCCTGTCCCTGCACCTGC                                     | RT-PCR       |
| DOT1L-R                         | GCTCACTGGCAGCCGGCCTG                                     |              |
| HSPA1A-F                        | AGGACATCAGCCAGAACAAG                                     | RT-PCR       |
| HSPA1A-R                        | GTAGAAGTCGATGCCCTCAA                                     |              |
| SGK1-F                          | GGAAACTCAATCTGGGTGTG                                     | RT-PCR       |
| SGK1-R                          | CTGCTTCATGAAAGCTGGAT                                     |              |
| JMJD6-F                         | GAAGTGGGATTCACATCGAC                                     | RT-PCR       |
| JMJD6-R                         | TCGGGTCACCTTGTGAGTT                                      |              |
| USP36-F                         | GCAGTGAGCACACGTATGAG                                     | RT-PCR       |
| USP36-R                         | ATTGAGAAAGCAGGTGTTGC                                     |              |
| WDR6-F                          | GGTCCACTCCTTACACACG                                      | RT-PCR       |
| WDR6-R                          | CTAGCATGGTGGTGAGATCC                                     |              |

**Table S1. Primer pair in this study**

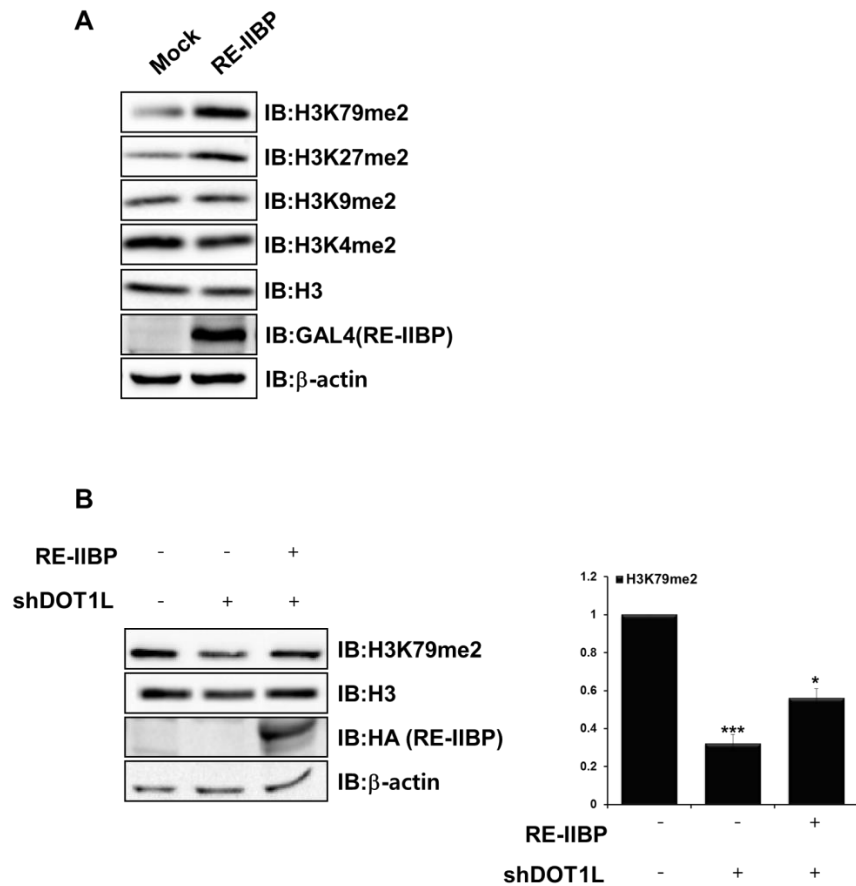

**Figure S1. RE-IIBP has H3K79 methylation activity.**

(a), HMTase activity was screened in RE-IIBP overexpressed 293T cells. Cells were lysed and immunoblotted with anti-H3K79me2, anti-H3K27me2, anti-H3K9me2, anti-H3K4me2 and anti-GAL4 antibodies.  $\beta$ -actin and H3 were used as loading controls. (b), Immunoblot analysis shows the relative methylation levels of H3K79 in DOT1L stably knocked-down and RE-IIBP rescued 293T cells. The methylation levels were normalized to H3 (left), and the relative expression level of H3K79me2 was quantified (right). Results are shown as means  $\pm$  SDs  $n = 3$ ; \* $p < 0.05$ , \*\*\* $p < 0.001$ .

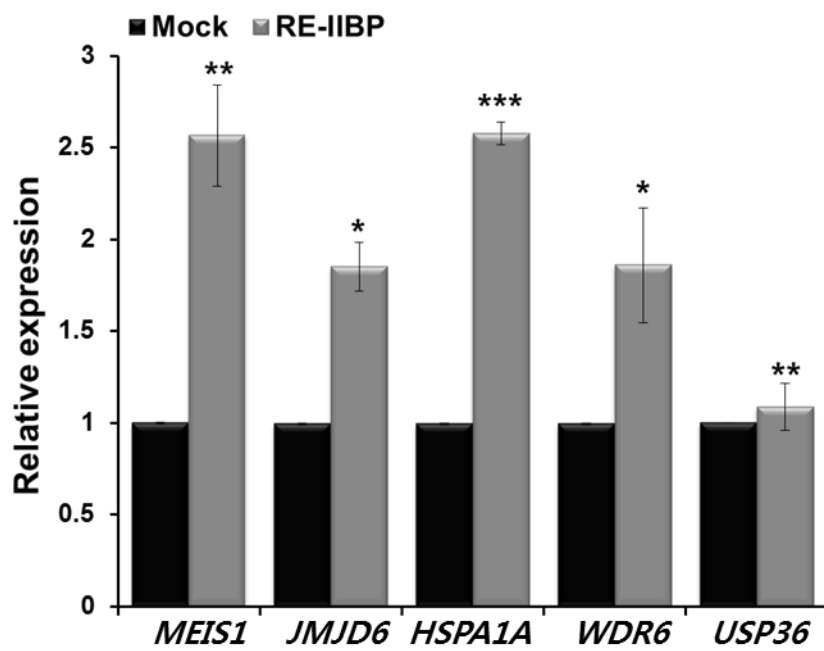

**Figure S2. Screening of selected RE-IIBP target genes**

(a), *MEIS1*, *JMJD6*, *HSPA1A*, *WDR6* and *USP36* mRNA levels were analyzed using real-time PCR in RE-IIBP overexpressed 293T cells. Each PCR primers used are presented in supplementary table S1. Results are shown as means  $\pm$  SDs, n = 3; \* $p$  < 0.05, \*\* $p$  < 0.01, \*\*\*  $p$  < 0.001

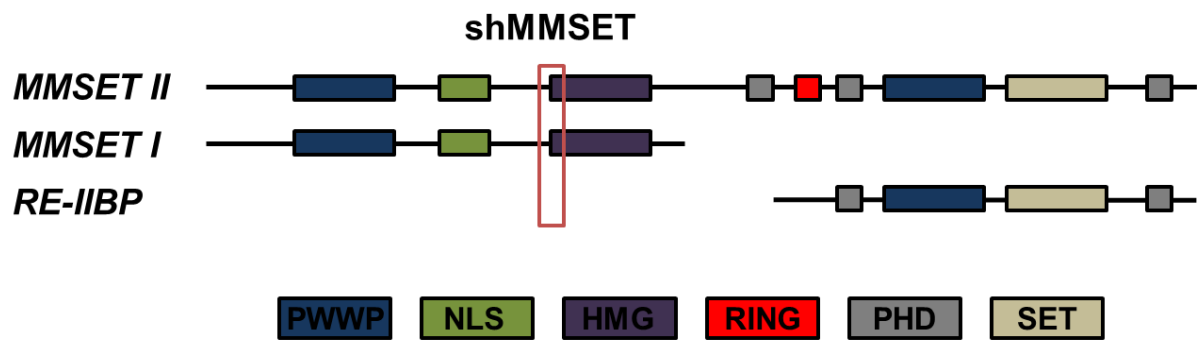

**Figure S3. Protein domains of MMSET/WHSC1 isoform RE-IIBP**

Schematic representation of *MMSETI*, *MMSETII*, and *RE-IIBP* domains. shMMSET RNA target regions are shown in the box.

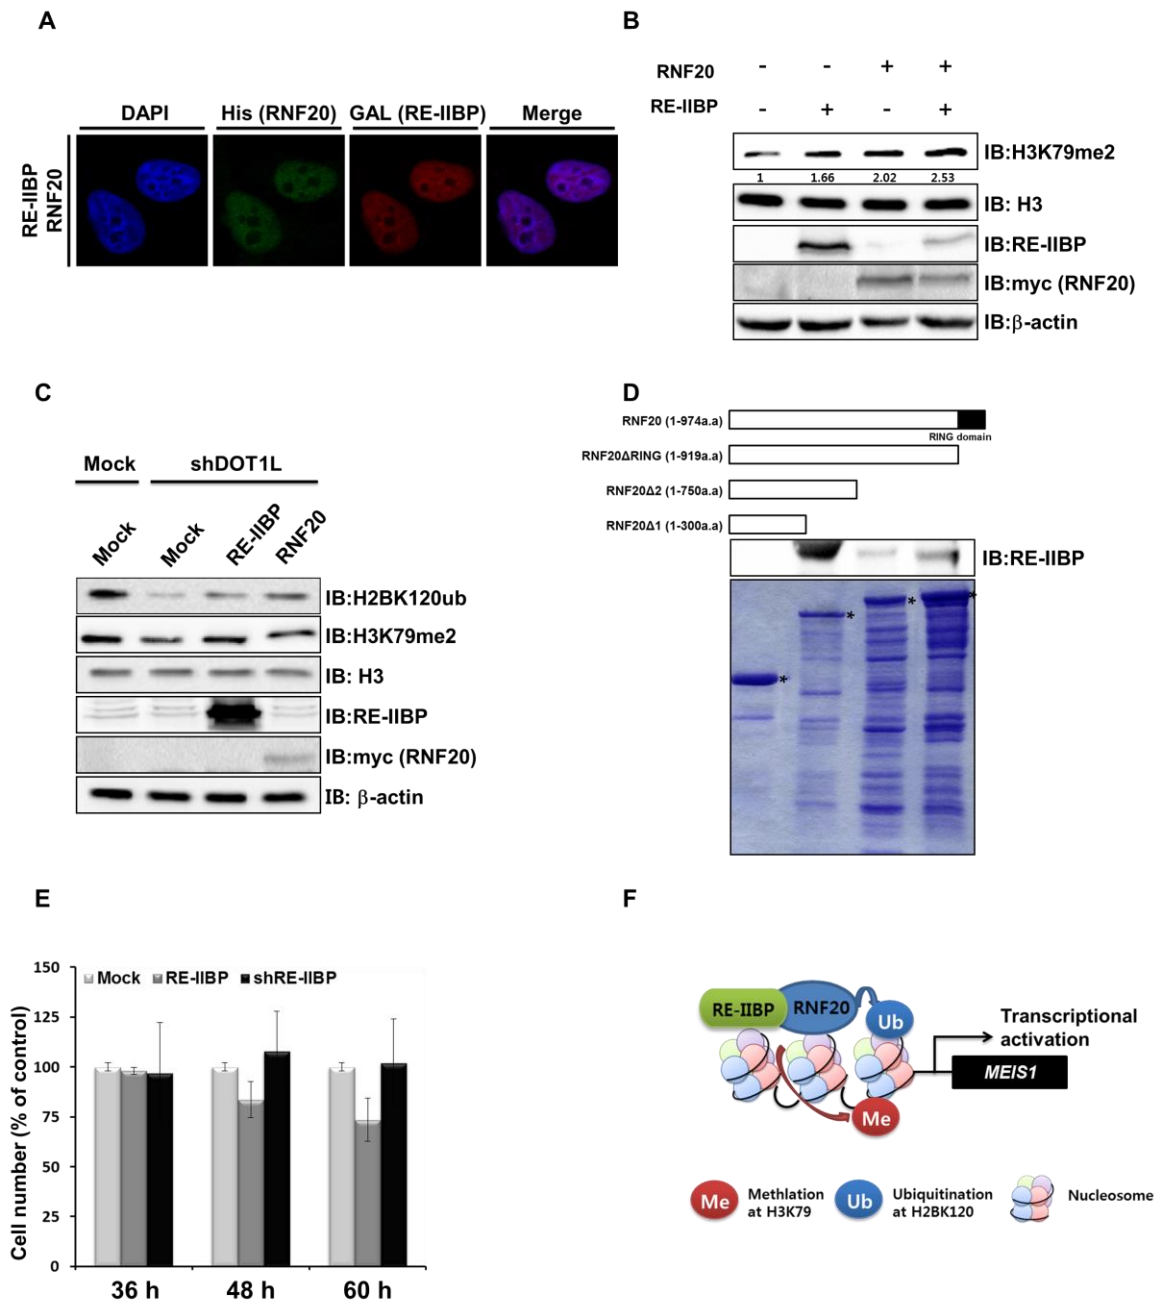

Figure S4

**Figure S4. RE-IIBP-mediated H3K79 methylation is dependent on H2BK120 ubiquitination by RNF20**

(a), 293T cells transiently transfected with RE-IIBP and RNF20 were fixed, permeabilized, and immunostained with anti-His and anti-GAL antibodies. Nuclei were counterstained with DAPI. (b), H3K79me<sub>2</sub> levels were analyzed in RE-IIBP and RNF20 transfected 293T cells. Cells were lysed or used for histone purification assay. Each extracts were immunoblotted with anti-H3K79me<sub>2</sub>, anti-RE-IIBP and anti-myc (RNF20) antibodies.  $\beta$ -actin and H3 were used as a loading control. (c), DOT1L stably knocked-down 293T cells were transfected with RE-IIBP and RNF20. Cells were lysed or used for histone purification assay. Each extracts were immunoblotted with indicated antibody. (d), RE-IIBP overexpressed 293T lysates were incubated with GST-RNF20 and GST-RNF20 deletion constructs. Associated proteins were eluted, resolved by SDS-PAGE, and immunoblotted with anti-RE-IIBP antibody. The amounts of full-length RNF20 and RNF20 deletion constructs were determined by Coomassie staining. (e), Cell survival was determined by the cell counting assay. Cells were transfected with RE-IIBP and shRE-IIBP for 36, 48, and 60 h, respectively. (f), Model for regulation of MEIS1 transcription through H3K79 methylation activity of RE-IIB
